# Supplementary material
Source: PubMed Central journal article supplement (PMC3370276)
Supplement: mmc1.pdf [file mmc1.pdf]

## Supplemental Data

### Strikingly Different Clinicopathological Phenotypes

#### Determined by Progranulin-Mutation Level

Katherine R. Smith, John Damiano, Silvana Franceschetti, Stirling Carpenter, Laura Canafoglia, Michela Morbin, Giacomina Rossi, Davide Pareyson, Sara E. Mole, John F. Staropoli, Katherine B. Sims, Jada Lewis, Wen-Lang Lin, Dennis W. Dickson, Hans-Henrik Dahl, Melanie Bahlo, and Samuel F. Berkovic

**Table S1. Alignment Statistics for Three Exomes from an Italian Family**

| Sample                     | Father     |        | Mother     |        | Son        |        |
|----------------------------|------------|--------|------------|--------|------------|--------|
|                            | N          | %      | N          | %      | N          | %      |
| Read Sequences             | 73,568,070 | 100.00 | 67,593,008 | 100.00 | 56,978,536 | 100.00 |
| Aligned                    | 69,181,736 | 94.04  | 63,380,692 | 93.77  | 53,589,746 | 94.05  |
| Unique Alignment           | 62,945,609 | 85.56  | 57,801,021 | 85.51  | 48,655,068 | 85.39  |
| post PCR duplicate removal | 54,616,711 | 74.24  | 49,880,709 | 73.80  | 41,618,887 | 73.04  |
| to chr7 linkage interval   | 44,326     | 0.06   | 40,488     | 0.06   | 33,517     | 0.06   |
| to chr17 linkage interval  | 237,458    | 0.32   | 208,634    | 0.31   | 179,021    | 0.31   |

**Table S2. Coverage of Targeted Bases for Three Exomes from an Italian Family**

| Sample Coverage           | Father | Mother | Son   |
|---------------------------|--------|--------|-------|
| Min.                      | 0      | 0      | 0     |
| 1 <sup>st</sup> quartile  | 14     | 13     | 11    |
| Median                    | 40     | 37     | 31    |
| Mean                      | 47.88  | 44.36  | 36.84 |
| 3 <sup>rd</sup> quartile  | 72     | 67     | 55    |
| Max.                      | 3396   | 5308   | 2389  |
| % bases covered $\geq 5$  | 86.2   | 85.5   | 84.7  |
| % bases covered $\geq 10$ | 79.9   | 79.0   | 77.0  |

Coverage statistics consider the 62,085,295 bases targeted the by TruSeq platform. Coverage statistics refer to uniquely aligning reads post PCR duplicate removal. Bases were required to have base quality  $\geq 13$  and come from a read with mapping quality  $\geq 13$  in order to contribute to coverage

**Table S3. Rare Functional Candidate Variants Detected in Linkage Peaks**

| <b>Gene</b>   | <b>Description</b>                                     | <b>UCSC<br/>knownGene ID</b> | <b>cDNA Change</b> | <b>Protein Change</b> | <b>dbSNP132</b> | <b>Frequency</b> | <b>PolyPhen-2<br/>Prediction</b> |
|---------------|--------------------------------------------------------|------------------------------|--------------------|-----------------------|-----------------|------------------|----------------------------------|
| <i>GRN</i>    | granulin precursor                                     | uc002igp.1                   | c.813_816del       | p.Thr272Serfs*10      | rs63749877      | -                | -                                |
| <i>DBF4B</i>  | DBF4 homolog B<br>isoform 2                            | uc002ihf.2                   | c.1711T>A          | p.Ser571Thr           | rs117190451     | 0.006            | Unknown                          |
| <i>ADAM11</i> | ADAM<br>metallopeptidase<br>domain 11<br>preproprotein | uc002ihh.2                   | c.569G>A           | p.Arg190Gln           | rs116926739     | 0.006            | Benign                           |

Variant frequency information is from the May 2011 release of the 1000 Genomes data; - indicates that the variant was not present. For all variants listed, the two parents are heterozygous while the affected son is homozygous.
